# Supplementary material for: Interleukin 33 exacerbates antigen driven airway hyperresponsiveness, inflammation and remodeling in a mouse model of asthma
Source: PubMed Central journal article supplement (PMC5484710; doi:10.1038/s41598-017-03674-0), 2017-06-26
Supplement: 41598_2017_3674_MOESM1_ESM.pdf [file 41598_2017_3674_MOESM1_ESM.pdf]

## Supplementary Information

**Title: Interleukin 33 exacerbates antigen driven airway hyperresponsiveness, inflammation and remodeling in a mouse model of asthma**

**Authors:** LC Sjöberg<sup>1,\*</sup>, A Zoltowska Nilsson<sup>2,\*</sup>, Y Lei<sup>2</sup>, JA Gregory<sup>1,3</sup>, M Adner<sup>1,3,#</sup> and GP Nilsson<sup>2,3,#</sup>

**Affiliations:**

<sup>1</sup> Unit of Experimental Asthma and Allergy Research, Institute of Environmental Medicine;

<sup>2</sup> Immunology and Allergy Unit, Department of Medicine; <sup>3</sup> Centre for Allergy Research, Karolinska Institutet, and Karolinska University Hospital, Stockholm, Sweden

\* These authors contributed equally to this study.

# These authors share senior authorship

**Corresponding author:**

Gunnar Nilsson, Department of Medicine, Solna, Immunology and Allergy Unit, Karolinska Institutet, KS L2:04 171 76 Stockholm

E-mail: [Gunnar.P.Nilsson@ki.se](mailto:Gunnar.P.Nilsson@ki.se); Phone: +46 8 517 702 05

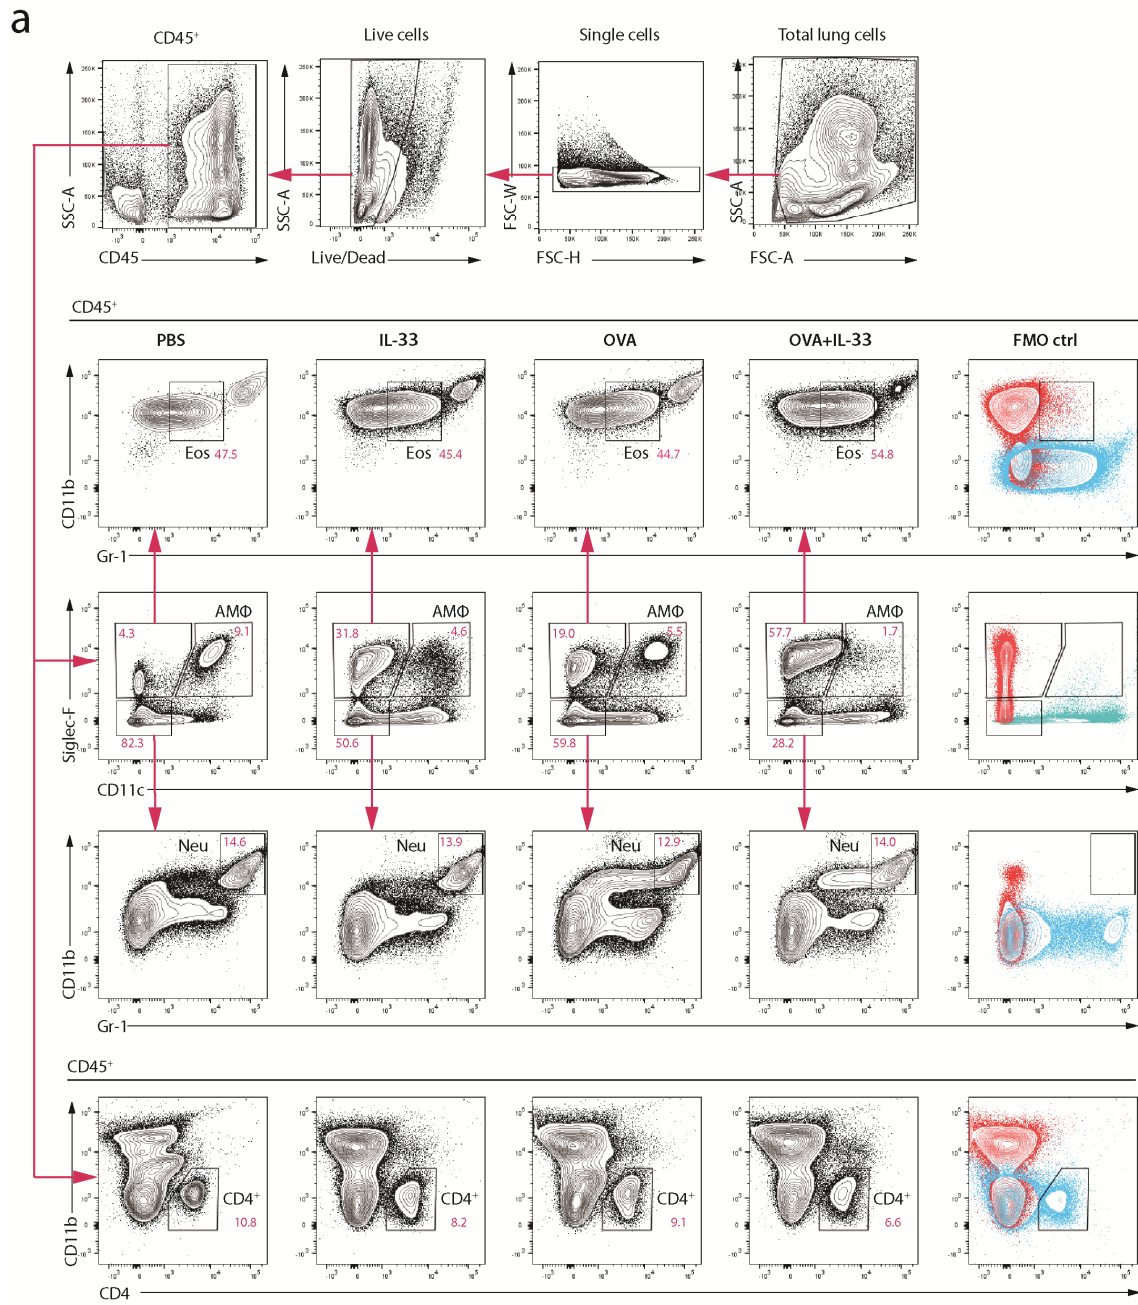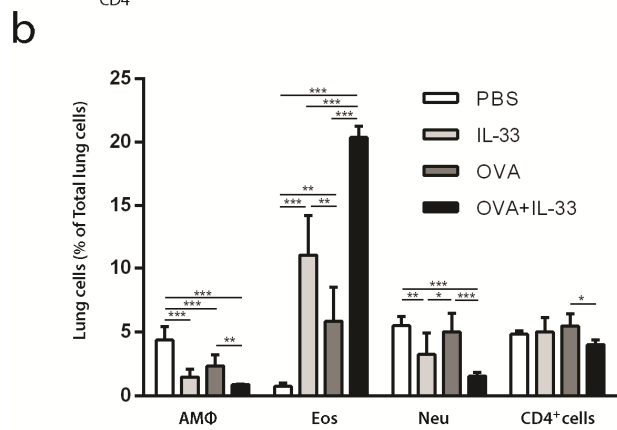

**Supplementary Figure S1. Flow cytometric analysis of inflammatory lung cells. (a)**

Gating strategy and representative plots for each exposure group. Alveolar macrophages were identified as CD45<sup>+</sup> SiglecF<sup>+</sup> CD11c<sup>+</sup>, eosinophils as CD45<sup>+</sup> SiglecF<sup>+</sup> CD11c<sup>-</sup> CD11b<sup>+</sup> Gr-1<sup>lo</sup>, neutrophils as CD45<sup>+</sup> SiglecF<sup>-</sup> CD11c<sup>-</sup> Gr-1<sup>hi</sup> CD11b<sup>hi</sup> and CD4<sup>+</sup> cells as CD45<sup>+</sup> CD11b<sup>-</sup> CD4<sup>+</sup>. Gates were set based on FMO controls, FMO ctrl= overlay of the two FMO controls for each respective plot. The representative FMO plots and plots showing the representative SSC<sup>low</sup> FSC<sup>low</sup> CD45<sup>+</sup> gating belong to the OVA+IL-33 group. (b) Lung frequencies of alveolar macrophages, eosinophils, neutrophils and CD4<sup>+</sup> cells. \*p<0.05, \*\*p<0.01, \*\*\*p<0.001 (ANOVA, Bonferroni). Results are pooled data of four independent experiments (mean ±SEM of n=8 mice in each group).
